# Supplementary material for: Incidence, Persistence, and Clearance of Anal Human Papillomavirus among Men Who Have Sex with Men in China: An Observational Cohort Study
Source: MDPI journal article supplement (doi:10.3390/pathogens11030314), 2022-03-03
Supplement: s1 [file s1]

**Table S1.** Demographic characteristics and sexual behaviors among men who have sex with men.

| Participant characteristics                        | Retained in Follow-Up |      | Lost in Follow-Up |      | P       |
|----------------------------------------------------|-----------------------|------|-------------------|------|---------|
|                                                    | (N = 196)             |      | (N = 341)         |      |         |
|                                                    | No. /Median (IQR)     | %    | No. /Median (IQR) | %    |         |
| Demographic                                        |                       |      |                   |      |         |
| Age at recruitment (years)                         | 27.3 (24.0-32.8)      |      | 25.7 (22.2-29.8)  |      | < 0.001 |
| < 20                                               | 7                     | 3.6  | 42                | 12.3 |         |
| 20-29                                              | 125                   | 63.8 | 217               | 63.6 |         |
| 30-39                                              | 36                    | 18.4 | 58                | 17.0 |         |
| ≥ 40                                               | 28                    | 14.3 | 24                | 7.0  |         |
| Site of enrollment                                 |                       |      |                   |      |         |
| Guangzhou                                          | 105                   | 53.6 | 167               | 49.0 | 0.006   |
| Wuxi                                               | 29                    | 14.8 | 89                | 26.1 |         |
| Shenzhen                                           | 62                    | 31.6 | 85                | 24.9 |         |
| Marriage                                           |                       |      |                   |      | 0.106   |
| In marriage/cohabitation or engagement with female | 31                    | 15.8 | 37                | 10.9 |         |
| Unmarried                                          | 165                   | 84.2 | 304               | 89.1 |         |
| Salary (yuan/month)                                |                       |      |                   |      | 0.717   |
| < 5000                                             | 86                    | 43.9 | 143               | 41.9 |         |
| ≥ 5000                                             | 110                   | 56.1 | 198               | 58.1 |         |
| Profession                                         |                       |      |                   |      | 0.124   |
| White-collar worker                                | 98                    | 50.0 | 164               | 48.1 |         |
| Service industry                                   | 27                    | 13.8 | 70                | 20.5 |         |
| Other                                              | 71                    | 36.2 | 107               | 31.4 |         |
| Used recreational drugs in the past 6 months       | 55                    | 28.1 | 83                | 24.3 | 0.357   |
| Sex with males                                     |                       |      |                   |      |         |
| Ever had anal sex                                  | 193                   | 98.5 | 328               | 96.2 | 0.188   |
| Time since first anal sex (year)                   | 4.1 (1.0-7.2)         |      | 3.2 (0.5-7.0)     |      | 0.315   |
| < 1                                                | 49                    | 25.0 | 111               | 32.6 |         |
| 1                                                  | 18                    | 9.2  | 38                | 11.1 |         |
| 2                                                  | 16                    | 8.2  | 17                | 5.0  |         |
| 3-4                                                | 31                    | 15.8 | 46                | 13.5 |         |
| 5-9                                                | 51                    | 26.0 | 82                | 24.0 |         |
| ≥ 10                                               | 31                    | 15.8 | 47                | 13.8 |         |
| Role in anal sex with males                        |                       |      |                   |      | 0.140   |
| Receptive <sup>a</sup>                             | 99                    | 50.5 | 147               | 43.1 |         |
| Insertive <sup>b</sup>                             | 57                    | 29.1 | 127               | 37.2 |         |
| Receptive and insertive                            | 40                    | 20.4 | 67                | 19.6 |         |
| No. of males with anal sex in lifetime             |                       |      |                   |      | 0.212   |

|                                                                                                           |               |      |               |      |       |
|-----------------------------------------------------------------------------------------------------------|---------------|------|---------------|------|-------|
| 0 or 1                                                                                                    | 9             | 4.6  | 30            | 8.8  |       |
| 2-5                                                                                                       | 73            | 37.2 | 136           | 39.9 |       |
| 6-10                                                                                                      | 50            | 25.5 | 81            | 23.8 |       |
| > 10                                                                                                      | 64            | 32.7 | 94            | 27.6 |       |
| <b>Current regular partners<sup>c</sup></b>                                                               |               |      |               |      | 0.936 |
| Have fixed partner <sup>d</sup>                                                                           | 33            | 16.8 | 61            | 17.9 |       |
| Have boy friend <sup>e</sup>                                                                              | 62            | 31.6 | 99            | 29.0 |       |
| Both                                                                                                      | 13            | 6.6  | 23            | 6.7  |       |
| Neither                                                                                                   | 88            | 44.9 | 158           | 46.3 |       |
| <b>No. of regular partners in the past 6 months</b>                                                       | 2.0 (1.0-3.0) |      | 2.0 (1.0-3.0) |      | 0.751 |
| 0 or 1                                                                                                    | 35            | 32.4 | 63            | 33.9 |       |
| 2-3                                                                                                       | 64            | 59.3 | 103           | 55.4 |       |
| > 3                                                                                                       | 9             | 8.3  | 20            | 10.8 |       |
| <b>Condom use always<sup>f</sup> in receptive anal sex with regular partners during the past 6 months</b> | 38            | 48.7 | 53            | 41.7 | 0.385 |
| <b>No. of casual partners<sup>g</sup> in the past 6 months</b>                                            | 2.0 (2.0-3.0) |      | 2.0 (3.0-3.0) |      | 0.837 |
| 0 or 1                                                                                                    | 46            | 23.5 | 79            | 23.2 |       |
| 2-3                                                                                                       | 106           | 54.1 | 177           | 52.1 |       |
| > 3                                                                                                       | 44            | 22.4 | 84            | 24.7 |       |
| <b>Condom use always in receptive anal sex with casual partners during the past 6 months</b>              | 96            | 54.5 | 182           | 57.8 | 0.507 |
| <b>HIV infection</b>                                                                                      | 14            | 7.1  | 25            | 7.4  | 1.000 |
